# Supplementary material for: Scoliosis epidemiology is not similar all over the world: a study from a scoliosis school screening on Chongming Island (China)
Source: BMC Musculoskelet Disord. 2016 Jul 22;17:303. doi: 10.1186/s12891-016-1140-6 (PMC4957389; doi:10.1186/s12891-016-1140-6)
Supplement: Additional file 1: — The raw data of 172 scoliosis patients. (XLSX 23 kb) [file 12891_2016_1140_MOESM1_ESM.xlsx]

## Sheet: 172例脊柱侧凸
schoolnumber	grade	class	number	sex	birth date	evaluation date	age	chronological age	scoliometer	Cobb angle	curve type	curve side	curve magnitude
01	2	1	0123	1	1995-04-03	2012-12-29	17	17.74	8	17	1	2	0
01	2	1	0171	2	1996-09-28	2012-12-29	16	16.25	6	13	1	2	0
02	6	2	0035	2	2000-10-07	2012-12-29	12	12.23	5	16	3	2	0
02	6	3	0139	1	2000-10-24	2012-12-29	12	12.18	6	12	3	1	0
02	6	3	0110	2	2000-07-04	2012-12-29	12	12.49	7	10	3	1	0
02	6	8	0020	2	2000-10-04	2012-12-29	12	12.24	6	10	1	1	0
03	8	2	0076	2	1998-05-25	2012-12-29	14	14.6	16	17	3	2	0
03	8	2	0115	2	1999-07-09	2012-12-29	13	13.48	5	18	1	2	0
03	4	1	0003	2	2002-05-25	2012-12-29	10	10.6	5	13	1	1	0
04	4	1	0156	2	2002-06-17	2012-12-29	10	10.54	5	10	3	1	0
05	9	1	0108	2	1996-06-25	2012-12-29	16	16.51	6	17	4	1	0
05	9	2	0122	2	1996-02-19	2012-12-29	16	16.86	8	14	3	1	0
05	9	2	0168	2	1997-12-01	2012-12-29	15	15.08	6	15	2	2	0
05	9	1	0015	2	1997-01-27	2012-12-29	15	15.92	11	13	1	2	0
06	9	1	0117	2	1997-12-01	2012-12-29	15	15.08	5	10	3	1	0
06	6	1	0043	2	1998-12-16	2012-12-29	14	14.04	5	10	2	2	0
06	9	1	0172	1	1997-10-08	2012-12-29	15	15.23	5	12	1	2	0
07	1	1	0113	1	2005-02-12	2012-12-29	7	7.88	5	10	1	2	0
08	6	4	0072	2	2000-12-04	2012-12-29	12	12.07	5	24	4	2	1
08	5	4	0053	2	2001-12-04	2012-12-29	11	11.07	5	11	4	2	0
08	8	2	0150	2	1997-07-31	2012-12-29	15	15.42	5	10	3	2	0
08	5	2	0102	1	2001-06-14	2012-12-29	11	11.54	5	14	2	1	0
08	8	3	0014	2	1998-10-04	2012-12-29	14	14.24	6	13	2	1	0
08	6	1	0131	1	2000-11-07	2012-12-29	12	12.14	5	11	2	1	0
08	7	4	0054	2	1999-06-24	2012-12-29	13	13.52	5	10	2	2	0
08	6	4	0051	1	2000-09-04	2012-12-29	12	12.32	5	34	1	2	1
09	2	2	0152	1	2003-12-29	2012-12-29	9	9	7	20	2	1	1
09	2	4	0145	1	2005-07-13	2012-12-29	7	7.46	5	13	2	1	0
09	2	1	0074	1	2004-11-04	2012-12-29	8	8.15	5	10	2	1	0
09	3	3	0099	1	2002-03-14	2012-12-29	10	10.8	7	14	1	1	0
09	2	2	0041	2	2004-02-15	2012-12-29	8	8.87	5	11	1	2	0
10	7	1	0162	1	1998-03-13	2012-12-29	14	14.8	7	10	1	2	0
11	5	1	0011	1	2002-08-22	2012-12-29	10	10.36	5	11	4	2	0
11	3	2	0165	1	2003-01-15	2012-12-29	9	9.96	6	11	2	1	0
11	3	3	0155	1	2003-10-11	2012-12-29	9	9.22	5	10	2	1	0
11	3	3	0086	1	2003-11-02	2012-12-29	9	9.16	5	10	1	1	0
12	10	7	0144	2	1996-04-24	2012-12-29	16	16.68	10	26	3	1	1
12	10	8	0116	2	1997-07-02	2012-12-29	15	15.49	18	36	2	1	1
12	9	4	0027	2	1998-09-25	2012-12-29	14	14.26	5	14	1	2	0
13	7	1	0128	2	1999-01-16	2012-12-29	13	13.95	9	13	3	1	0
14	5	1	0169	2	2001-02-28	2012-12-29	11	11.83	5	10	2	1	0
14	2	1	0012	2	2003-10-04	2012-12-29	9	9.24	5	10	2	1	0
15	3	3	0164	1	2003-12-07	2012-12-29	9	9.06	5	10	3	2	0
15	3	3	0163	1	2002-08-26	2012-12-29	10	10.34	6	10	2	1	0
16	8	1	0037	2	1998-02-03	2012-12-29	14	14.9	7	16	1	1	0
16	6	2	0121	2	2002-10-20	2012-12-29	10	10.19	5	12	1	1	0
17	2	2	0007	1	2005-08-11	2012-12-29	7	7.39	5	15	1	1	0
18	5	3	0134	2	2001-03-04	2012-12-29	11	11.82	10	22	3	1	1
18	5	2	0059	2	2001-10-14	2012-12-29	11	11.21	5	15	2	2	0
18	1	4	0118	1	2005-03-03	2012-12-29	7	7.83	6	10	2	1	0
19	5	3	0137	2	2001-04-18	2012-12-29	11	11.7	5	10	2	2	0
20	5	3	0105	1	2001-10-04	2012-12-29	11	11.24	5	10	2	1	0
20	5	3	0009	2	2001-10-24	2012-12-29	11	11.18	10	25	1	2	1
21	3	1	0107	2	2003-12-10	2012-12-29	9	9.06	5	10	1	1	0
22	5	2	0067	2	2002-09-24	2012-12-29	10	10.27	8	16	4	2	0
22	3	1	0126	2	2003-04-13	2012-12-29	9	9.72	5	14	2	1	0
22	3	1	0081	2	2003-10-26	2012-12-29	9	9.18	5	12	2	1	0
22	2	5	0013	1	2004-04-09	2012-12-29	8	8.72	5	18	1	2	0
22	4	5	0161	2	2002-02-07	2012-12-29	10	10.89	5	14	1	2	0
22	2	5	0088	2	2004-02-24	2012-12-29	8	8.85	5	12	1	1	0
23	4	1	0095	2	2002-01-20	2012-12-29	10	10.94	5	12	3	1	0
24	7	7	0160	1	2000-08-09	2012-12-29	12	12.39	6	14	2	1	0
24	5	3	0056	2	2001-09-04	2012-12-29	11	11.32	7	28	1	2	1
25	4	5	0049	1	2002-12-10	2012-12-29	10	10.05	5	18	4	2	0
25	1	4	0170	2	2005-11-05	2012-12-29	7	7.15	5	15	2	1	0
26	9	2	0159	2	1996-02-11	2012-12-29	16	16.88	7	10	4	1	0
27	2	1	0147	1	1995-11-12	2012-12-29	17	17.13	6	10	1	2	0
28	5	2	0091	1	2002-07-29	2012-12-29	10	10.42	5	12	2	2	0
28	5	1	0125	2	2001-03-02	2012-12-29	11	11.83	5	11	1	2	0
29	8	1	0026	2	1998-11-26	2012-12-29	14	14.09	5	13	2	1	0
29	7	1	0148	2	1999-11-23	2012-12-29	13	13.1	6	12	2	1	0
30	8	2	0154	2	1998-05-25	2012-12-29	14	14.6	5	12	4	2	0
31	7	1	0002	1	1998-03-10	2012-12-29	14	14.81	5	11	1	2	0
31	3	2	0055	2	2003-12-17	2012-12-29	9	9.04	5	15	2	1	0
31	4	1	0142	1	2002-10-04	2012-12-29	10	10.24	5	10	2	1	0
31	8	1	0100	1	1999-09-23	2012-12-29	14	13.27	5	10	2	1	0
31	1	2	0132	1	2005-11-06	2012-12-29	7	7.15	5	12	1	1	0
31	4	1	0111	2	2003-07-10	2012-12-29	9	9.47	5	11	1	2	0
32	3	1	0098	1	2002-02-17	2012-12-29	10	10.87	5	13	3	1	0
33	5	2	0143	1	2001-10-04	2012-12-29	11	11.24	5	12	3	2	0
33	1	1	0038	1	2005-02-17	2012-12-29	7	7.86	5	11	3	1	0
33	2	2	0060	2	2005-08-23	2012-12-29	7	7.35	5	11	2	1	0
34	2	2	0103	2	2004-10-04	2012-12-29	8	8.24	6	10	3	1	0
35	4	1	0057	2	2002-04-17	2012-12-29	10	10.7	5	11	3	2	0
35	5	8	0052	2	1999-02-02	2012-12-29	13	13.91	5	10	3	2	0
35	4	1	0097	2	2002-04-07	2012-12-29	10	10.73	5	12	2	1	0
35	4	1	0135	2	2002-05-01	2012-12-29	10	10.67	5	18	4	2	0
36	4	1	0114	2	2001-04-06	2012-12-29	11	11.73	5	17	3	1	0
36	3	2	0036	2	2003-12-19	2012-12-29	9	9.03	5	11	2	2	0
36	2	4	0063	1	2004-07-25	2012-12-29	8	8.43	5	10	2	1	0
37	11	10	0008	2	1995-11-18	2012-12-29	17	17.12	5	10	1	1	0
38	7	1	0096	2	1999-05-02	2012-12-29	13	13.66	5	14	1	1	0
39	1	1	0064	1	2006-07-29	2012-12-29	6	6.42	5	10	1	2	0
39	3	1	0047	2	2003-04-13	2012-12-29	9	9.72	5	10	1	1	0
40	3	1	0104	1	2002-04-16	2012-12-29	10	10.71	5	11	1	2	0
41	2	3	0079	1	2004-01-12	2012-12-29	8	8.96	5	13	2	1	0
42	3	2	0068	2	2001-01-02	2012-12-29	11	11.99	6	17	4	2	0
43	3	2	0073	2	2001-01-02	2012-12-29	11	11.99	5	15	4	2	0
43	4	1	0151	2	2002-06-10	2012-12-29	10	10.56	5	12	3	1	0
43	2	2	0025	2	2005-07-05	2012-12-29	7	7.49	5	10	1	1	0
43	3	2	0084	2	2005-07-05	2012-12-29	7	7.49	5	10	1	1	0
43	2	2	0016	2	2004-10-10	2012-12-29	8	8.22	6	10	1	1	0
44	6	2	0087	1	2000-10-04	2012-12-29	12	12.24	6	11	3	1	0
45	6	2	0077	2	2000-11-13	2012-12-29	12	12.13	6	15	3	2	0
45	6	3	0010	2	2000-01-04	2012-12-29	12	12.99	5	12	1	1	0
45	6	3	0119	1	2000-12-07	2012-12-29	12	12.06	5	10	1	2	0
46	3	2	0019	2	2003-03-13	2012-12-29	9	9.8	5	12	2	1	0
46	3	3	0146	2	2003-12-22	2012-12-29	9	9.02	6	10	2	1	0
46	2	1	0066	1	2004-06-03	2012-12-29	8	8.57	7	21	1	2	1
47	2	2	0136	2	2005-07-06	2012-12-29	7	7.48	11	11	2	1	0
48	2	1	0065	2	2003-07-23	2012-12-29	9	9.44	6	12	1	2	0
48	2	1	0120	2	2004-12-08	2012-12-29	8	8.06	5	10	1	2	0
49	7	2	0024	2	1999-02-15	2012-12-29	13	13.87	5	13	4	1	0
49	6	2	0140	1	2000-05-04	2012-12-29	12	12.66	5	11	4	1	0
49	6	2	0029	2	2000-12-04	2012-12-29	12	12.07	5	10	2	2	0
49	7	3	0040	2	1999-09-21	2012-12-29	13	13.27	6	12	1	1	0
49	7	3	0127	2	1999-05-16	2012-12-29	13	13.62	7	10	1	2	0
50	1	1	0023	2	2006-07-28	2012-12-29	6	6.42	5	17	2	1	0
50	1	1	0044	2	2006-08-05	2012-12-29	6	6.4	5	13	2	2	0
51	8	4	0071	2	1998-06-28	2012-12-29	14	14.51	5	20	4	1	1
51	8	12	0050	2	1995-03-25	2012-12-29	17	17.77	5	14	3	1	0
51	5	1	0138	2	2001-05-12	2012-12-29	11	11.63	5	12	2	2	0
51	8	10	0133	1	1998-10-22	2012-12-29	14	14.19	5	15	1	1	0
51	8	4	0031	2	1998-02-13	2012-12-29	14	14.88	6	14	1	2	0
51	8	4	0080	1	1998-05-02	2012-12-29	14	14.66	6	13	1	2	0
51	8	12	0106	2	1998-12-04	2012-12-29	14	14.07	5	11	1	1	0
51	8	10	0166	1	1999-07-02	2012-12-29	13	13.5	5	10	1	2	0
51	7	3	0005	2	1999-01-18	2012-12-29	13	13.95	5	10	1	2	0
51	7	3	0006	2	1999-01-18	2012-12-29	13	13.95	5	10	1	2	0
52	1	4	0130	1	2005-11-25	2012-12-29	7	7.09	5	10	3	2	0
52	2	1	0141	1	2005-08-18	2012-12-29	7	7.37	5	11	2	2	0
52	1	2	0109	1	2006-07-22	2012-12-29	6	6.44	5	10	2	1	0
52	3	1	0004	1	2003-10-10	2012-12-29	9	9.22	6	18	1	2	0
52	3	3	0030	1	2003-06-08	2012-12-29	9	9.56	5	18	1	1	0
52	1	3	0167	2	2005-09-12	2012-12-29	7	7.3	5	12	1	1	0
52	4	2	0092	2	2003-07-08	2012-12-29	9	9.48	8	11	1	1	0
52	4	2	0062	1	2002-11-15	2012-12-29	10	10.12	5	11	1	2	0
52	1	3	0129	2	2005-04-17	2012-12-29	7	7.7	5	10	1	2	0
53	6	1	0046	2	2000-10-17	2012-12-29	12	12.2	6	12	3	2	0
53	7	1	0078	2	1999-11-13	2012-12-29	13	13.13	5	10	3	1	0
53	6	1	0153	1	2000-10-08	2012-12-29	12	12.23	6	10	2	1	0
54	7	2	0094	1	1999-10-04	2012-12-29	13	13.24	8	11	3	1	0
54	9	1	0069	1	1997-04-01	2012-12-29	15	15.75	7	10	2	1	0
54	7	2	0101	1	1998-09-16	2012-12-29	14	14.29	5	12	1	2	0
55	7	1	0158	2	1999-02-02	2012-12-29	13	13.91	5	11	3	2	0
55	7	1	0149	2	1999-06-13	2012-12-29	13	13.55	5	14	2	1	0
56	7	2	0075	2	1999-02-12	2012-12-29	13	13.88	5	11	3	1	0
56	8	4	0090	1	1998-03-10	2012-12-29	14	14.81	6	14	2	1	0
56	7	3	0021	2	1999-02-14	2012-12-29	13	13.87	6	19	1	2	0
56	7	1	0083	2	1999-05-20	2012-12-29	13	13.61	8	11	1	2	0
57	8	3	0034	2	1998-08-19	2012-12-29	14	14.36	5	11	3	1	0
57	10	1	0022	1	1997-09-02	2012-12-29	15	15.32	5	16	3	2	0
57	10	1	0048	1	1996-09-16	2012-12-29	16	16.29	11	12	3	1	0
58	1	1	0045	1	2005-11-20	2012-12-29	7	7.11	5	10	3	1	0
59	4	1	0124	2	2002-04-29	2012-12-29	10	10.67	5	14	4	1	0
60	5	1	0032	2	2001-05-12	2012-12-29	11	11.63	6	16	2	1	0
60	6	4	0058	1	2000-11-15	2012-12-29	12	12.12	5	11	2	1	0
61	11	6	0093	1	1995-09-20	2012-12-29	17	17.28	9	14	1	2	0
62	3	3	0085	1	2003-03-06	2012-12-29	9	9.82	5	10	4	1	0
62	3	2	0157	1	2003-05-11	2012-12-29	9	9.64	5	14	2	2	0
62	3	3	0089	2	2003-07-20	2012-12-29	9	9.45	5	10	2	1	0
62	2	1	0042	1	2004-12-01	2012-12-29	8	8.08	5	10	1	1	0
62	2	3	0018	2	2004-03-08	2012-12-29	8	8.81	5	10	1	2	0
63	10	3	0082	2	1996-03-31	2012-12-29	16	16.75	10	15	4	2	0
63	10	8	0033	1	1996-05-24	2012-12-29	16	16.6	5	18	1	1	0
63	10	8	0017	2	1996-12-31	2012-12-29	16	16	6	15	1	2	0
63	10	3	0001	1	1996-03-11	2012-12-29	16	16.8	5	11	1	1	0
64	4	1	0028	1	2003-07-16	2012-12-29	9	9.46	5	10	2	2	0
64	3	1	0112	1	2003-04-23	2012-12-29	9	9.69	7	10	1	2	0
65	4	2	0061	1	2002-10-23	2012-12-29	10	10.19	5	10	2	1	0
65	4	1	0070	2	2002-02-10	2012-12-29	10	10.88	6	12	1	1	0
65	4	2	0039	2	2002-11-09	2012-12-29	10	10.14	5	10	1	2	0
